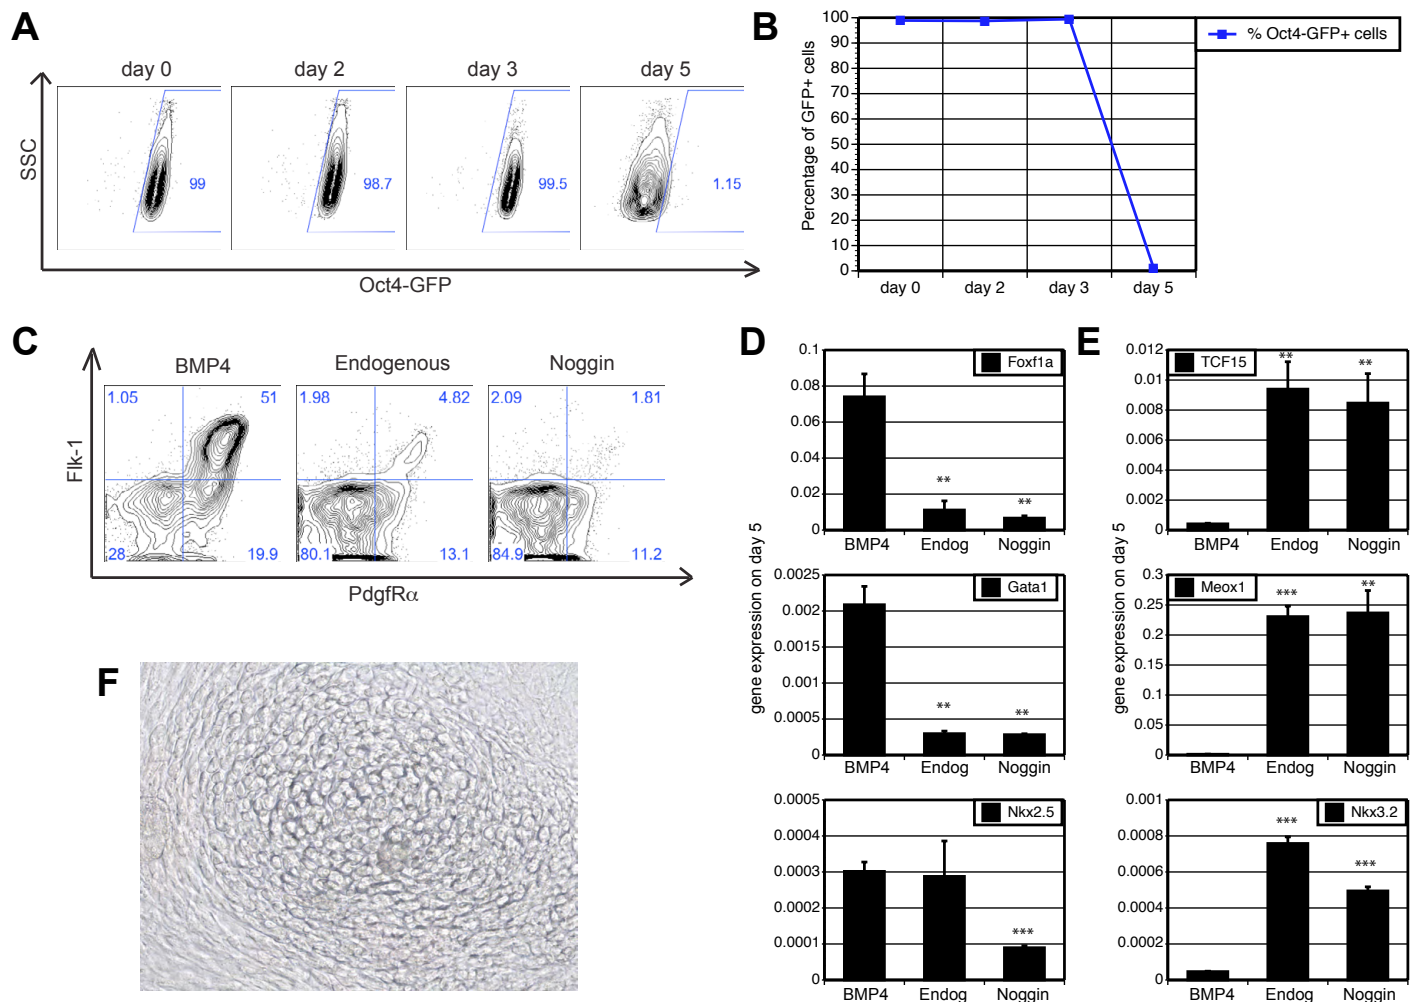

**Fig. S1. BMP signaling influences mesoderm development from mouse iPSCs.** Oct4-GFP miPSCs were differentiated according to the serum-free protocol shown in Fig. 1A. miPSCs were induced at day 2 for 24 hours with activin, Wnt3a, VEGF, and one of: BMP4, no BMP4 added (Endogenous, Endog), or noggin. On day 3 of culture, EBs were re-aggregated in the presence of bFGF for 2 days and then plated in monolayer culture in SFD containing BMP4 and bFGF for up to 12 days. **(A)** Flow cytometric analysis showing downregulation of Oct4-GFP over the first 5 days of differentiation (Act, Wnt3a and noggin-induced). **(B)** Quantification of GFP<sup>+</sup> cells over the course of differentiation by flow cytometry ( $n=6$ ). **(C)** Flow cytometric analysis showing expression of Flk-1 and *Pdgfrα* after 1 day induction in indicated conditions. **(D,E)** Q-PCR analysis of expression of (D) the lateral plate mesoderm gene (*Foxf1a*), hematopoietic (*Gata1*) and cardiac (*Nkx2.5*) transcription factors, and (E) paraxial mesoderm (*Tcf15*) and somite (*Meox1*, *Nkx3.2*) genes in day 5 aggregates. Significance relative to BMP4-induced cultures. Values represent copy number relative to  $\beta$ -actin. \* $P<0.05$ , \*\* $P<0.01$ , \*\*\* $P<0.001$ . **(F)** Micrograph of chondrocytes in monolayer culture derived from Activin, Wnt3a and noggin-induced miPSCs. Magnification 20 $\times$ .

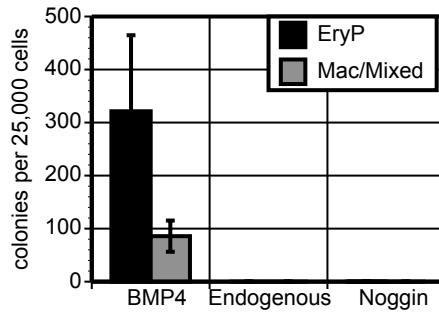

**Fig. S2. Hematopoietic potential is restricted to mESC-derived cells induced with BMP4 (in combination with activin, Wnt and VEGF).** Total number of primitive erythroid colonies (EryP) and macrophage/mixed colonies (Mac/Mixed) formed from day 5 populations induced as in Fig. 1. Colonies were scored following 7 days of culture in methylcellulose-based media containing hematopoietic cytokines. Error bars indicate s.e.m. ( $n=3$ ). EB-derived cells were plated in 1% (w/v) methylcellulose containing 10% (v/v) plasma-derived serum, 5% (v/v) protein-free hybridoma medium (PFHM-II) and the following cytokines: 1% (v/v) kit ligand conditioned medium, 1% (v/v) thrombopoietin conditioned medium, erythropoietin (2 U/ml), IL11 (25 ng/ml), 1% (v/v) IL3 conditioned medium, 1% (v/v) GM-CSF conditioned medium and IL6 (5 ng/ml).

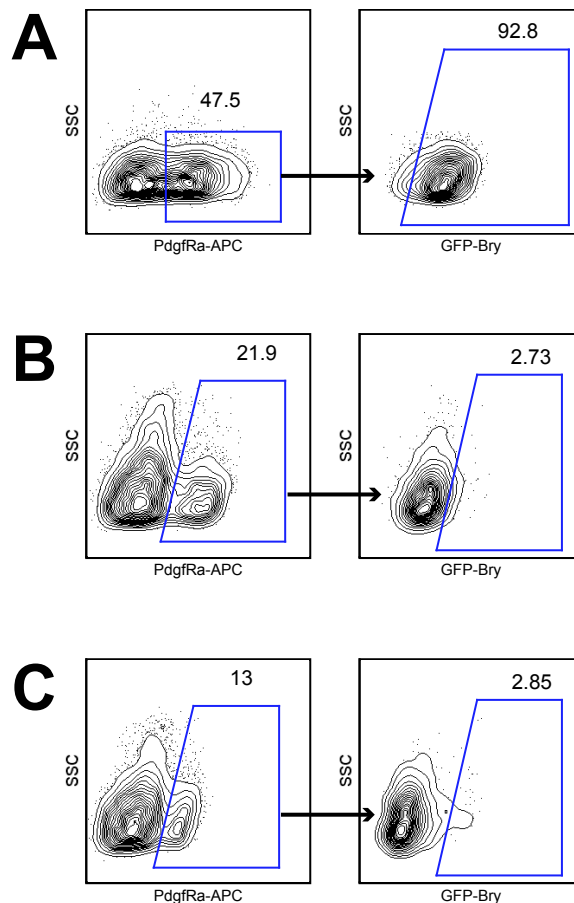

**Fig. S3. Pdgfr $\alpha$  populations at day 3 and day 5 are distinguished by the expression of Brachyury.** Populations were first gated on P<sup>+</sup> cells, expression of GFP-Bry was observed in P<sup>+</sup> cells. (A) The majority (>92%) of day 3 P<sup>+</sup> cells in noggin-induced EBs express GFP-Bry. (B,C) Less than 3% of day 5 P<sup>+</sup> cells derived from either day 3 P<sup>-</sup> aggregates (B) or bulk (unsorted on day 3) aggregates (C) express GFP-Bry.

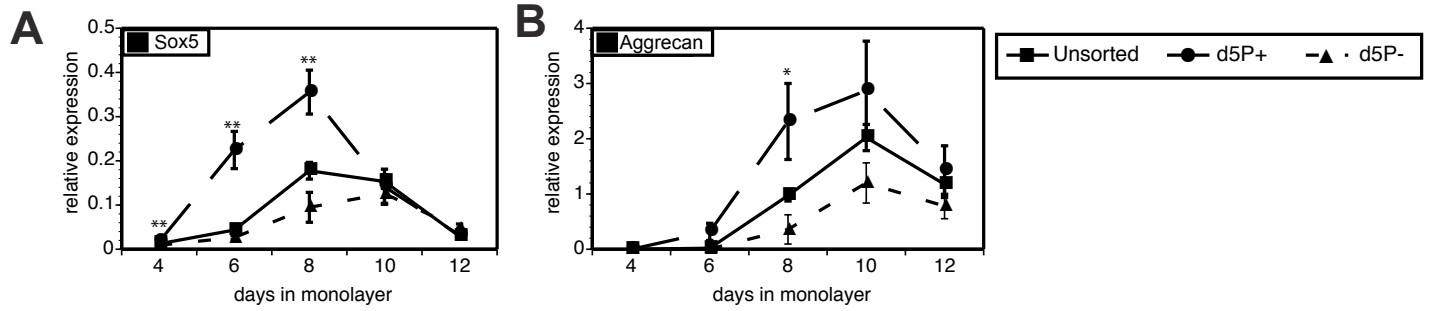

**Fig. S4. Chondrogenic potential is detected in the Bry-P<sup>+</sup> cell fraction isolated from bulk differentiation cultures on day 5.** (A,B) P<sup>+</sup> and P<sup>-</sup> populations were isolated by FACS from day 5 aggregates and cultured in monolayers in CH media for an additional 12 days. Sox5 (A) and aggrecan (B) expression were significantly higher in d5P<sup>+</sup>-derived monolayers compared with d5P<sup>-</sup>-derived cultures. Significance of gene expression values in d5P<sup>+</sup> monolayer cultures was compared with d5P<sup>-</sup>-derived cultures. Error bars indicate s.e.m. (*n*=3). Values represent copy number relative to β-actin. \**P*<0.05, \*\**P*<0.01, \*\*\**P*<0.001.

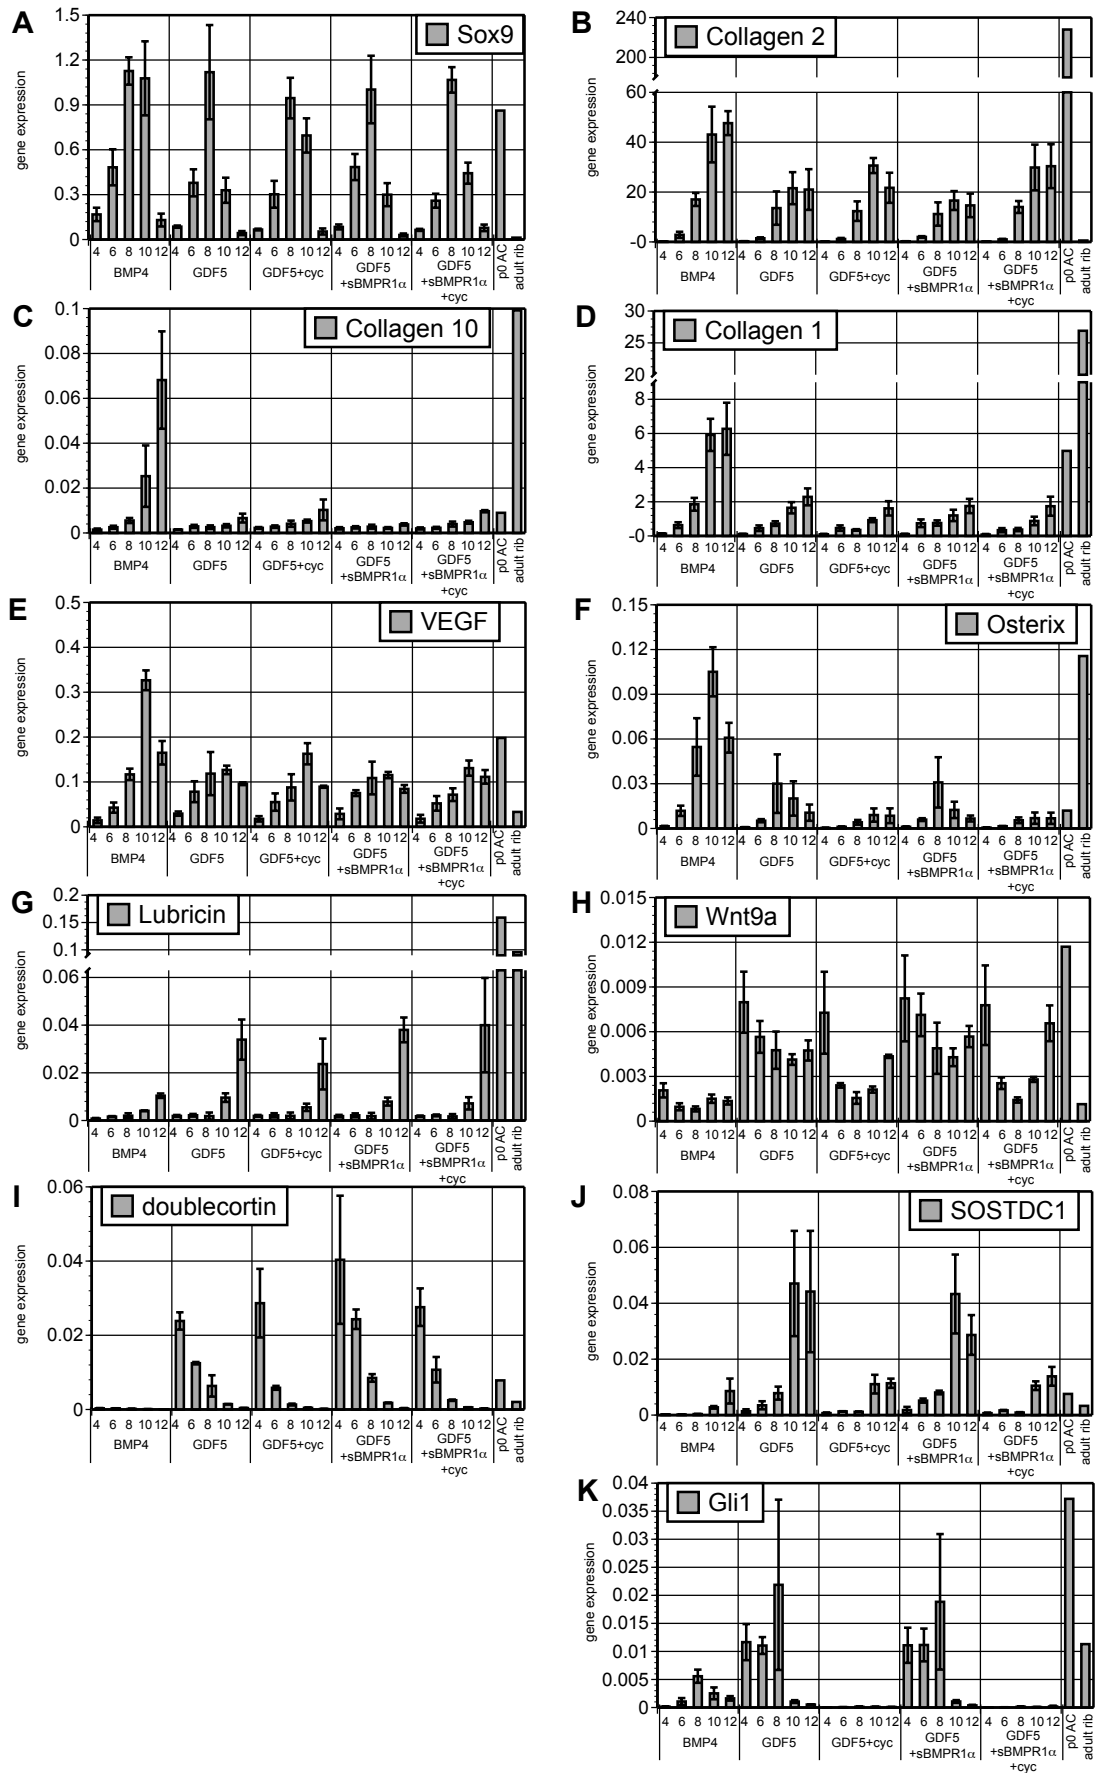

**Fig. S5. Gene expression profiles of BMP4- and Gdf5-treated mESC-derived mesoderm in the presence of the BMP4 inhibitor sBmpr1 $\alpha$  and the hedgehog inhibitor cyclopamine (cyc) during monolayer culture. (A-K) Gene expression analyses of the indicated genes following 4, 6, 8, 10 and 12 days of monolayer culture under different culture conditions. Values represent copy number relative to  $\beta$ -actin.**

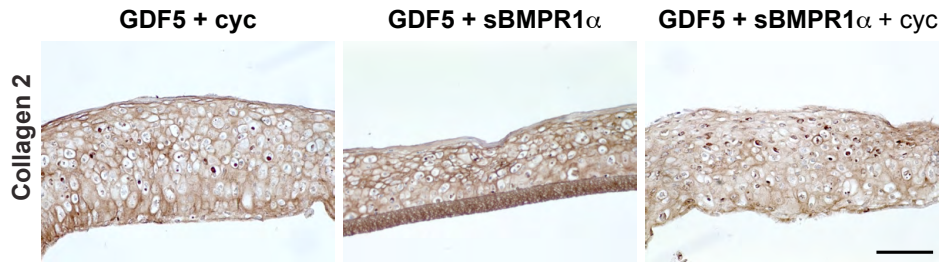

**Fig. S6. Chondrocytes that develop in cultures with Gdf5, the hedgehog inhibitor (cyc) and/or the BMP4 inhibitor (sBmpr1 $\alpha$ ) generated cartilage-like tissues that express collagen 2.** Filter cultures were analyzed after 5 weeks and immunohistochemistry was used to visualize collagen 2 expression. Scale bar: 100  $\mu$ m.

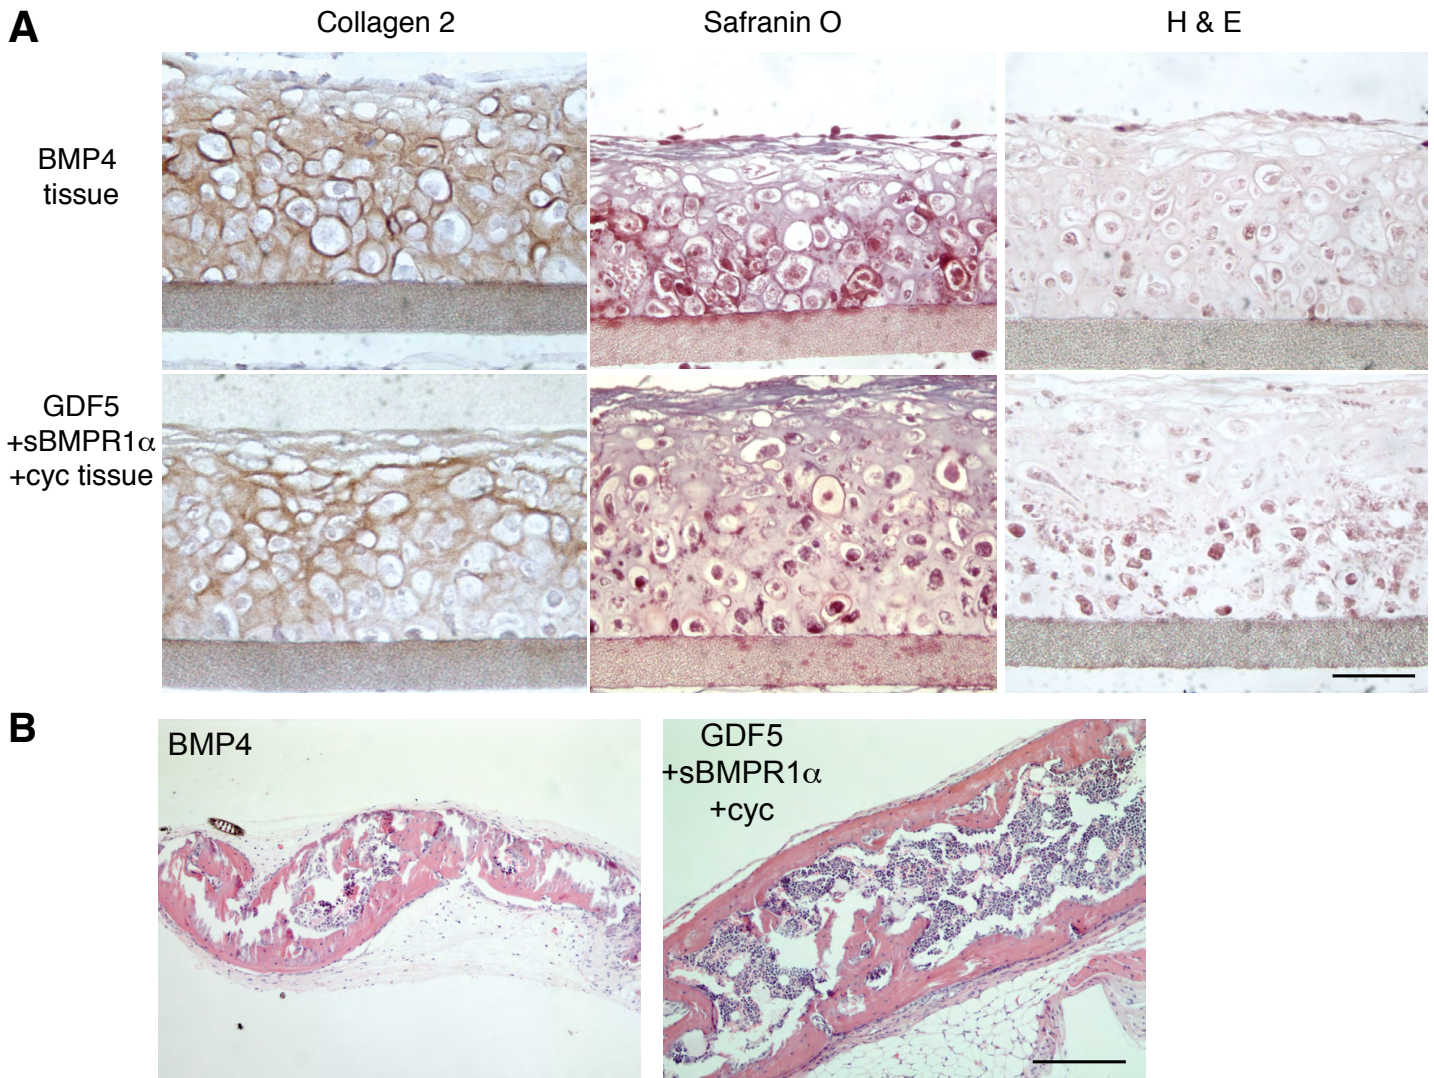

**Fig. S7. Mouse ESC-derived cartilage tissue transplanted within diffusion chambers for 4 weeks shows no evidence of ossification, whereas comparable tissue transplanted without the chambers for the same period of time is completely ossified.** Cartilage-like tissue was generated from BMP4-treated or Gdf5+sBmpr1 $\alpha$ +cyc-treated chondrocytes for 4 weeks *in vitro* and then placed within diffusion chambers prior to subcutaneous implantation into immunodeficient mice. Mice were sacrificed at 4 weeks post transplantation, the diffusion chambers were isolated and the contents analyzed histologically for the presence of stable cartilage and/or bone-like tissue. **(A)** Collagen 2 immunohistochemistry, safranin O and Hematoxylin and Eosin (H&E) staining of cartilage-like tissue that was harvested after 4 weeks *in vivo*. **(B)** Three-dimensional cartilage tissue derived from mESCs were transplanted subcutaneously for 4 weeks. H&E staining of the grafts after 4 weeks shows bone-like tissue and hematopoietic cells contained within the graft. Scale bars: 50 in A; 100  $\mu$ m in B.

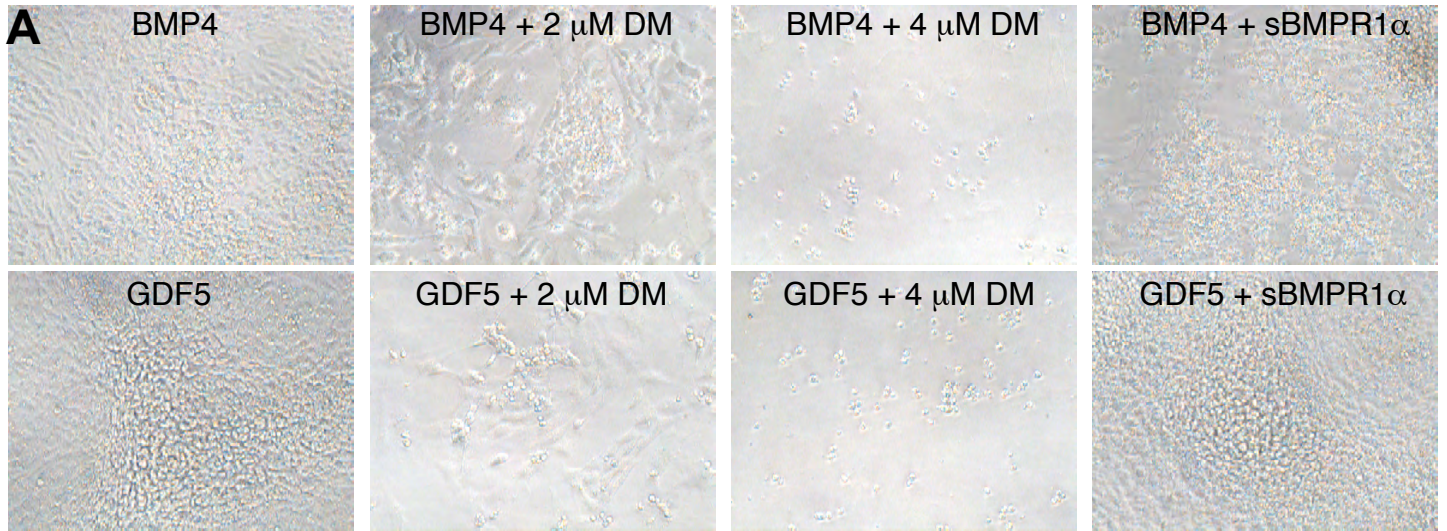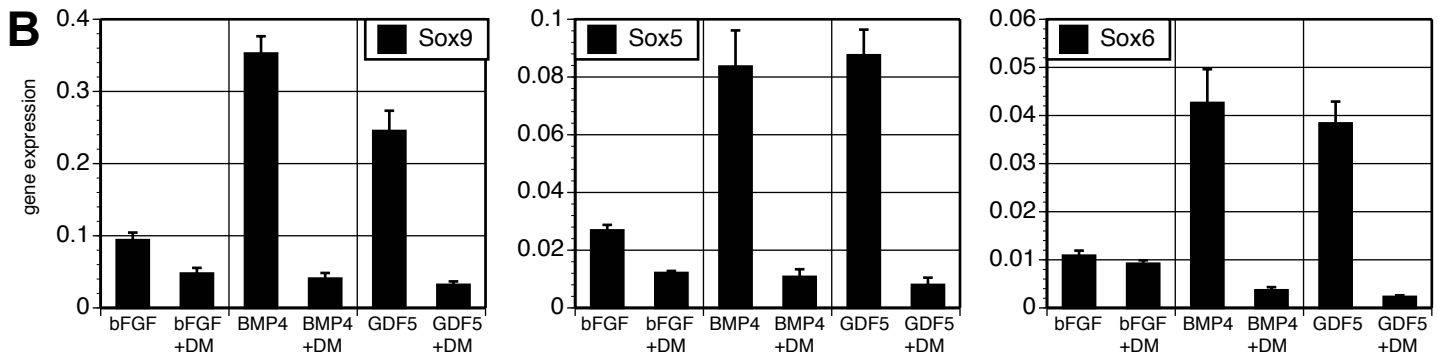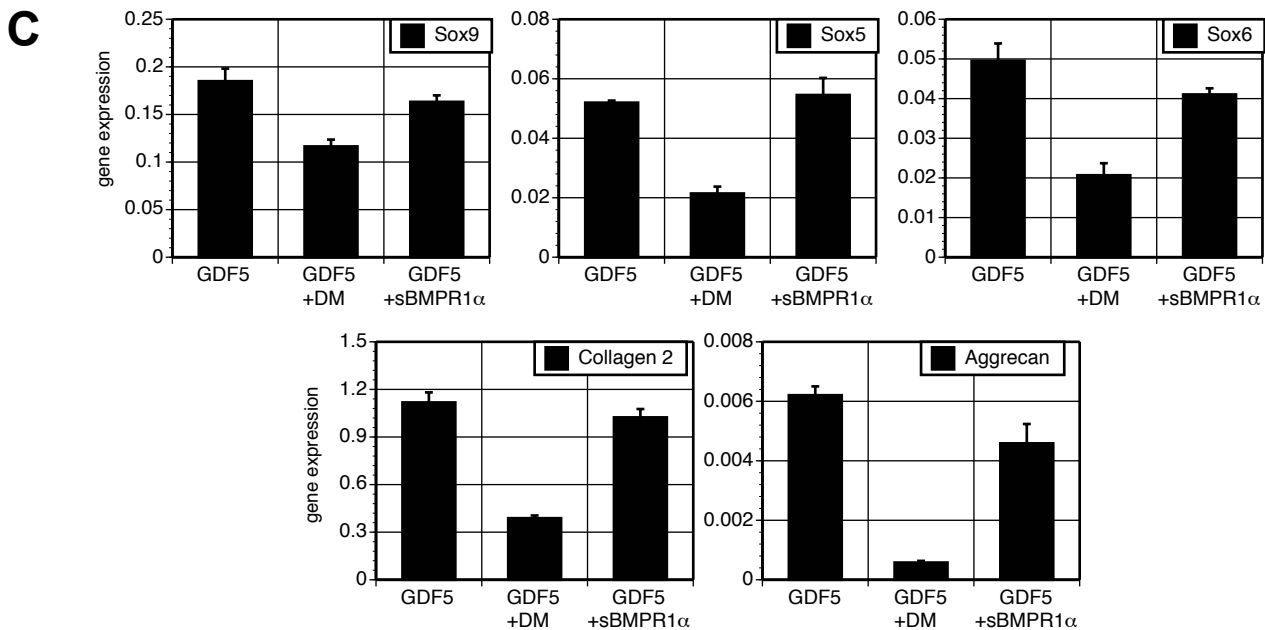

**Fig. S8. BMP4 and Gdf5-mediated chondrogenic effects appear to be dependent on Bmpr1-mediated phosphorylation events.** mESC-derived chondrogenic mesoderm was cultured in the presence of BMP4 or Gdf5 in combination with effective doses of dorsomorphin (DM), the small molecule inhibitor of the type I receptors Alk-2, -3, -6, or with the soluble Bmpr1α (sBmpr1α). **(A)** Micrographs of monolayer cultures in indicated conditions after 7 days. DM treatment at 4 μM resulted in cell death, whereas a lower concentration (2 μM) inhibited chondrogenesis in both BMP4- and Gdf5-treated cells. Gdf5-mediated chondrogenesis was not inhibited by sBmpr1α, whereas BMP4-mediated chondrogenesis was inhibited by sBmpr1α. Magnification 20x. **(B)** DM treatment (2 μM) prevented the upregulation of chondrocyte transcription factors Sox9, Sox5 and Sox6 in day 6 monolayers treated with BMP4 or Gdf5. **(C)** sBmpr1α did not prevent the expression of chondrogenic transcription factors or collagen 2 and aggrecan expression in Gdf5-treated cultures on day 7. Gene expression is copy number relative to β-actin.

**Table S1. Primers**

| <b>Gene</b>    | <b>Forward</b>                  | <b>Reverse</b>                  |
|----------------|---------------------------------|---------------------------------|
| $\beta$ -actin | TGA GCG CAA GTA CTC TGT GTG GAT | ACT CAT CGT ACT CCT GCT TGC TGA |
| <i>Tcf15</i>   | AAG GAC TCC AGA GAA AGA GGC CAT | TCC TTA CAC AAC GCA GGA GTG GTT |
| <i>Meox1</i>   | AGC GTC TTG TGT TCT CCA AGG     | ATG TGT GTG AAC CTG GGA GGT     |
| <i>Nkx3.2</i>  | TCA GAA CCG TCG CTA CAA GAC CAA | CAG CAC CTT TAC GGC CAC TTT CTT |
| <i>Tbx18</i>   | CGC CCA GCC ATT CCT GTT TAT TCT | AAG GCT GTC ATC CAC CTT CCT TCA |
| <i>Mesp1</i>   | TTT CCT TTG GTC TTG GCA CCT TCG | TCC AAG GAG GGT TGG AAT GGT ACA |
| <i>Foxf1a</i>  | ATG CCA TGG CCT CTT CTT CTA TGC | ACA CGG CTT GAT GTC TTG GTA GGT |
| <i>Gata1</i>   | ATG GAA TCC AGA CGA GGA         | CTC CCC ACA ATT CCC ACT         |
| <i>Nkx2.5</i>  | ACC TTT AGG AGA AGG GCG ATG ACT | AAG TGG GAT GGA TCG GAG AAA GGT |
| <i>Sox9</i>    | AGG TTT CAG ATG CAG TGA GGA GCA | CAC AAC ACA CGC ACA CAT CCA CAT |
| <i>Sox5</i>    | ATA AGG GCC AAC AGA CTG TGG TGA | GTT AAT GTG CTT GGC CAC TGG GAA |
| <i>Sox6</i>    | ATT CCT CCT CCA AGG CTG ACA ACA | GGC CAG CAT TTG ACA AGT GGA ACA |
| <i>Col2a1</i>  | CCA AAC ACT TTC CAA CCG CAG TCA | AGT CTG CCC AGT TCA GGT CTC TTA |
| aggrecan       | ATC CCA CCC ACA TGG TGT CTT CTT | TTA GAT GCA GTT TGG GTG ATG CGG |
| <i>Col10a1</i> | TGG AGA TGC ATT TGG AGG TAG GCT | AGG GCT TTA GGA TTG CTG AGT GCT |
| <i>Col1a1</i>  | TGG CGG TTA TGA CTT CAG CTT CCT | GGT CAC GAA CCA CGT TAG CAT CAT |
| <i>Osterix</i> | TTG CCA GTG CCT AGT TCC TAT GCT | AGG CCA GAT GGA AGC TGT GAA GAA |
| <i>Vegf</i>    | GTG TGT GTG TGT GTG TGT GTG TGT | TCA CCG ATC TGG GAG AGA GAG ATT |
| lubricin       | AGC CAA TGA AGA AGT GCA CAG GGA | AGG TGT GTG TCT GGA AAG GTC CAA |
| <i>Wnt9a</i>   | AGG CCA GAG CCT CTT TGA TCT TCT | AAA GAC AGC TCC CTT GTG AGT CCA |
| doublecortin   | GGA ATG TTT GGC AAG GCC CAT GTA | AGT CCT CAA ACC AAA CAG CCC TCA |
| <i>Sostdc1</i> | AGT CCA GCC ACA ACT TTG AAA GCG | AGA CTG TGC TTG CTG GAT TTG CTG |
| <i>Gli1</i>    | ACA CTC AGC TGG ACT TTG TGG CTA | AGA CAC TCA TGT TAC CCA CTG CCA |
